# Supplementary material
Source: PubMed Central journal article supplement (PMC11072786)

# Supplementary Fig. S1

**A**

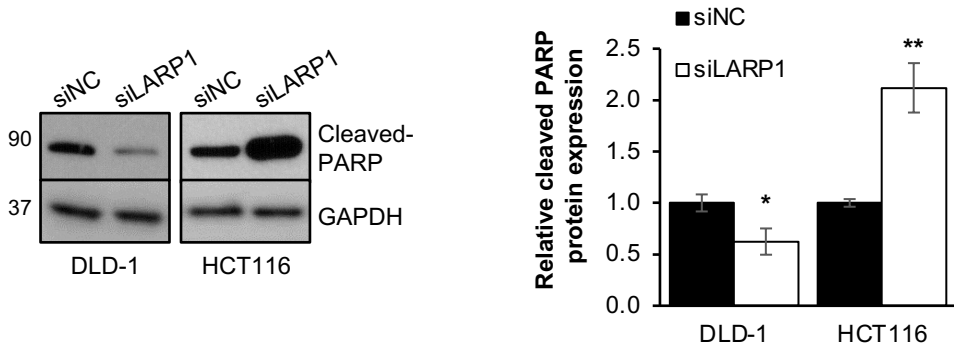

**B**

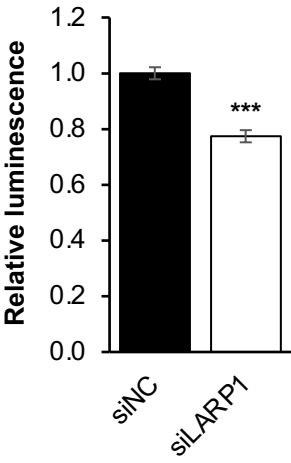

**C**

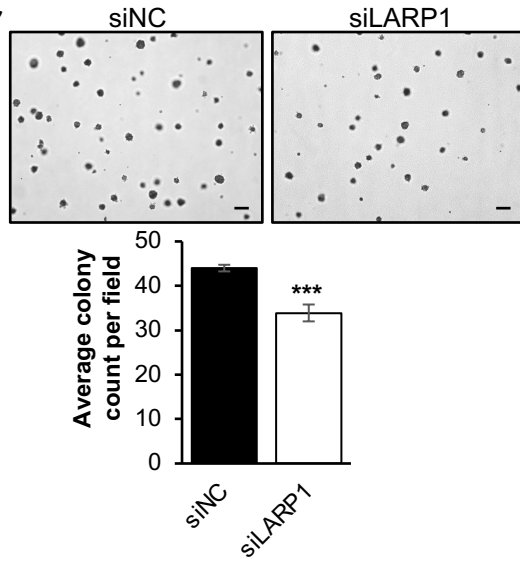

**D**

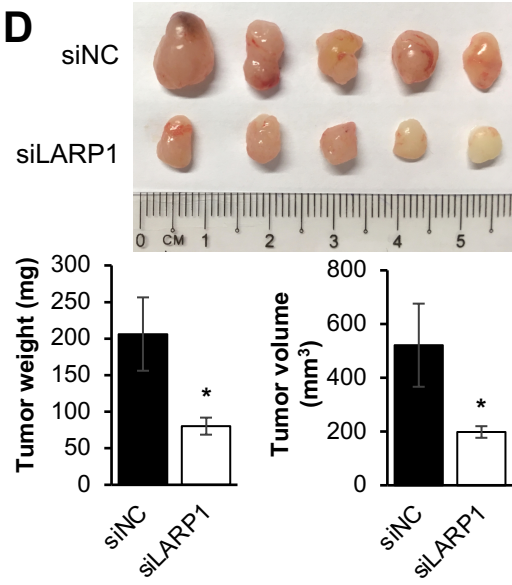

**E**

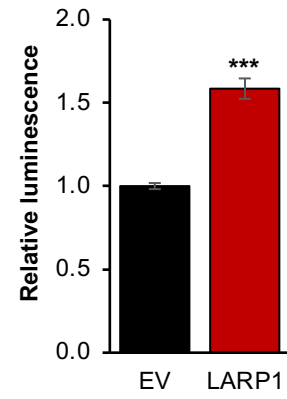

**F**

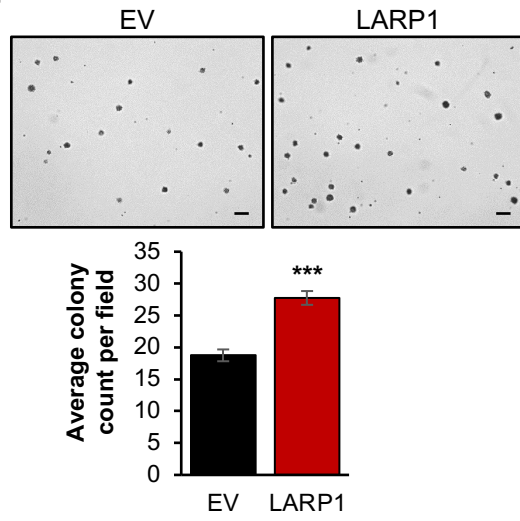

**G**

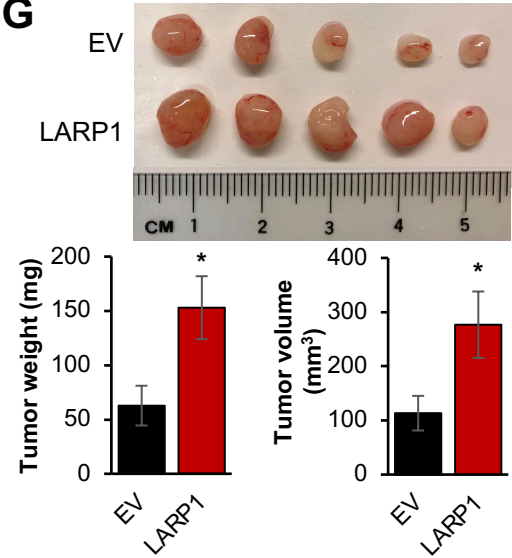

# Supplementary Fig. S2

## A

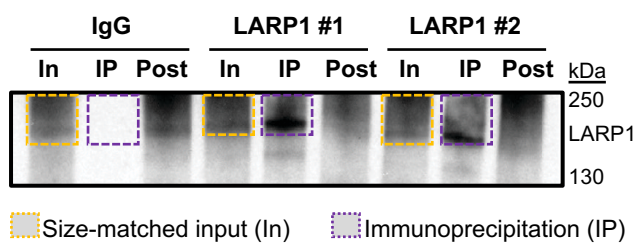

## B

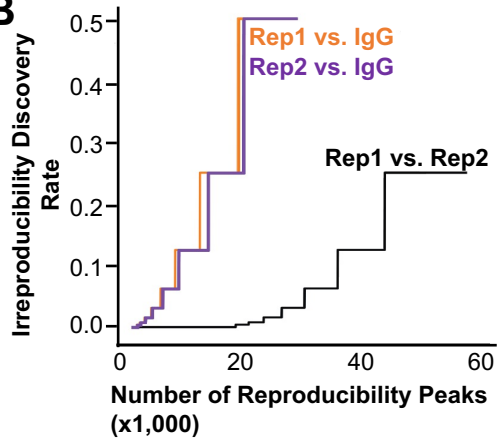

## C

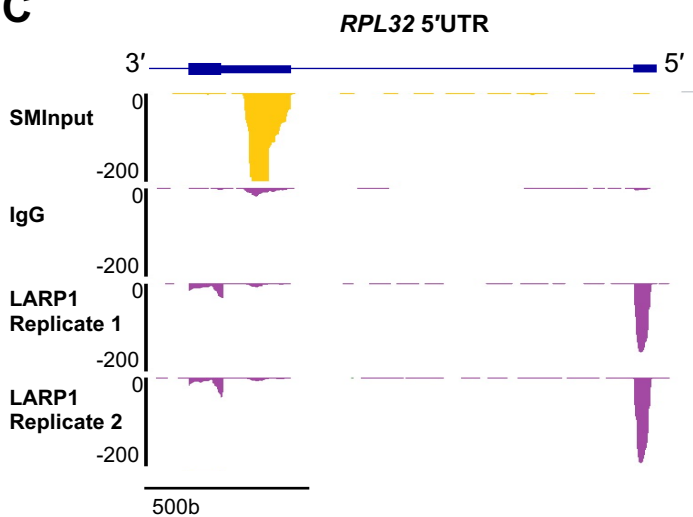

## D

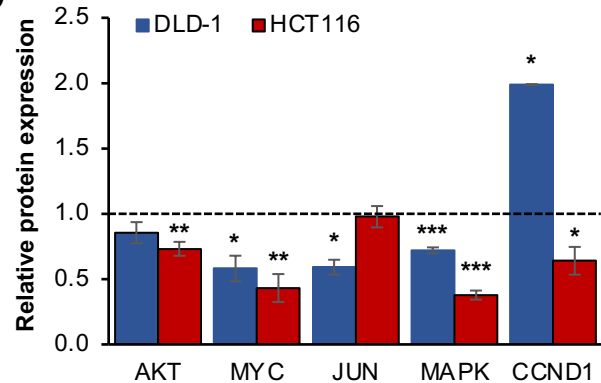

## E

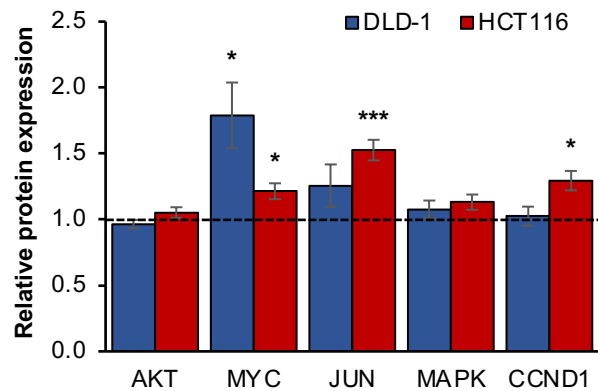

## F

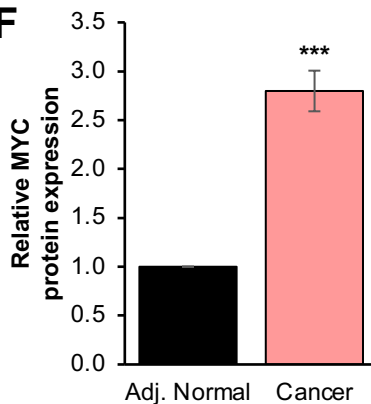

## G

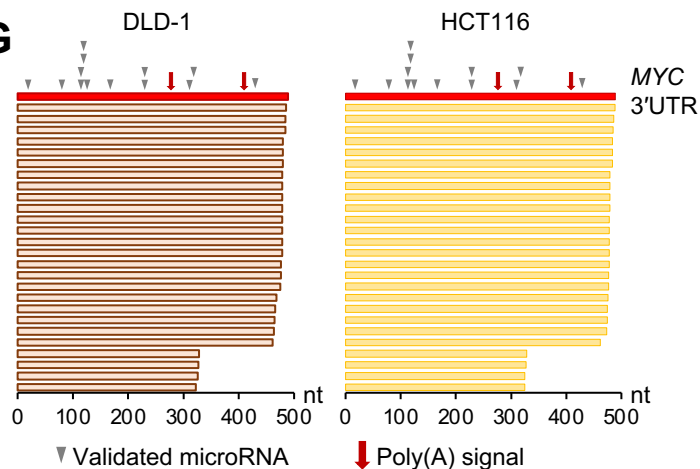

## H

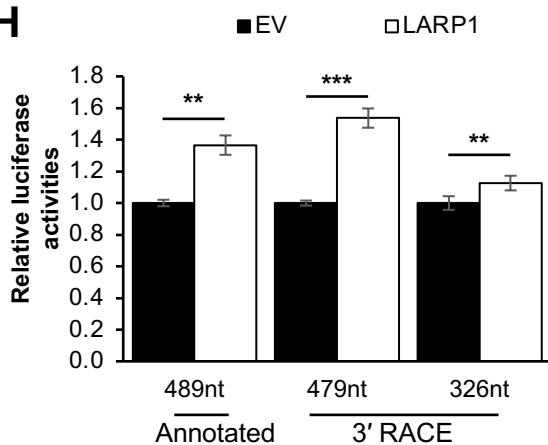

# Supplementary Fig. S3

**A**

| Gene Name | Protein Name                                             | Peptides (95%) | Unused score |
|-----------|----------------------------------------------------------|----------------|--------------|
| PABPC3    | Polyadenylate-binding protein 3                          | 5              | 10.00        |
| ILF3      | Interleukin enhancer-binding factor 3                    | 5              | 10.00        |
| IGF2BP2   | Insulin-like growth factor 2 mRNA-binding protein 2      | 5              | 4.00         |
| DSP       | Desmoplakin                                              | 3              | 6.00         |
| GNAI1     | Guanine nucleotide-binding protein G(i) subunit alpha-1  | 3              | 6.00         |
| TAOK1     | Serine/threonine-protein kinase TAO1                     | 3              | 6.00         |
| U2SURP    | U2 snRNP-associated SURP motif-containing protein        | 3              | 4.78         |
| LARP1     | La-related protein 1                                     | 2              | 4.00         |
| RPL13A    | 60S ribosomal protein L13a                               | 2              | 4.00         |
| HADHB     | Trifunctional enzyme subunit beta, mitochondrial         | 2              | 4.00         |
| HNRNPUL1  | Heterogeneous nuclear ribonucleoprotein U-like protein 1 | 2              | 3.33         |
| PRPF40A   | Pre-mRNA-processing factor 40 homolog A                  | 2              | 2.15         |

**B**

**LARP1 amino acid sequence:**

MATQVEPLLPGGATLLQAEHGGGLVRKKPPPAPEGKGEPPNDVRRGGEPDGSARRPRPPCAKPHKEGTGQQERESPRPLQLPGAEGPAIS  
 DGEEGGGEPGAGGGAAGAAGARRDFVEAPPKVNVPWTKNALPPVLTVNGQSPPEHSAPAKVVRAAVPKQRKGSKVGDFGDAINWPTP  
 GEIAHKSVPQSHKPQPTRKLPKPKDMKEQEKGEKSDSKESPKTKSDESGEEKNGDEDCQRRGGQKKKGNKHKWVPLQIDMKPEVPREKLA  
 SRPTRPPEPRHIPANRGEIKGSSEATYVPVAPPTPAWQPEIKPEAWHDQDETSSVKSDGAGGARASFRGRGRGRGRGRGRGRGRGGTRTHF  
 DYQFGYRKFDGVEGPRTPKYMNNITYYFDNVSSTELYSVDQELLKDYIKRQIEYYFSVDNLERDFFLRKMDADGFLPITLIASFHRVQALTTDI  
 SLIFAALKDSKVVIEVDEKVRREEPEKWLPLPIVDYSQTDFSQLNCPFVPRQHYQKETESAPGSRAVTPVPTKTEEVSNLKTLPKGLSAS  
 LPDLSENWIEVKKRPRPSPARPKKSEESRFSHLTSLPQQQLPSQQLMSKDQDEQEELDFLDEEMEQQMDGRKNTFTAWSDEESDYEIDDRD  
 VNKILIVTQTPHYMRRRHPGGDRTGNHTSRAKMSAELAKVINDGLFYEQDLWAEKFEPEYSQIKQEVENFKKVNMSIREQFDLTLPPEPVDPN  
 QEVPPGPPR**FQQVPTDALANKLFGAPEPSTIAR**SLPTTVPESPNYRNRTRPTRTPQLKDDSSQTSRFYFPVVEKGRTLDAKMPRKRKTRHSS  
 NPPLSHVGVWVMDSREHRRRTASISSPSEGTPVGSYGCTPQSLPKFKQHPHSHELLKENGFTQHVYHKYRRRLNCRKLGIGQSQEMNTL  
 FRFWSF<sup>1</sup>LRDFHFNKMYE<sup>2</sup>EFKQ<sup>3</sup>LALEDAKEGYRY<sup>4</sup>GLECLFRYYSYGLEKKFRLDIFKDFQEETVKDYEAGQLYGLEKFWAFLKYSKAKNLDID  
 PKLQ<sup>5</sup>EYLGKFRRLDFRVDPPMGE<sup>6</sup>EGNHKRHSVVA<sup>7</sup>GGGGGEGRKRCPSSSSRPAAMISQPPTPPTGQPVREDAKWTSQHSNTQTLGK  
**FQQVPTDALANK** **LFGAPEPSTIAR**

**C**

**Amino acid alignment:**

FDTLTPEPPVDPNQEVPPGPPR**FQQ** - - - - - **VP** - - - - **TDALANKLFGAPEPSTIA** - - RSLPTTVPESP **LARP1**  
 F+ LTPE P + PNQEV P + +Q +P TD LA KLF E ++ A SLPT VPESP **Matched residues**  
 FENLTPELPFE PNQEVVAPSQRSRGGVQGVLHPIPKKDLTDELAQKLFVSEITSAMVHSLPTAVPESP **LARP2**

**D**

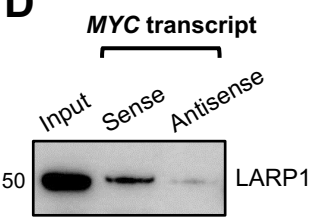

**E**

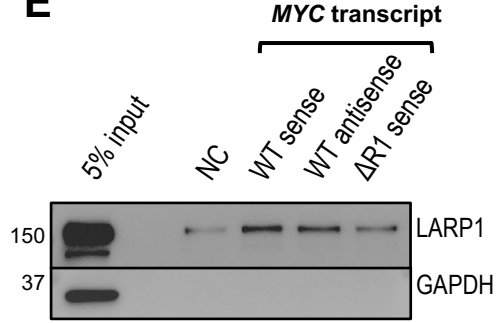

**F**

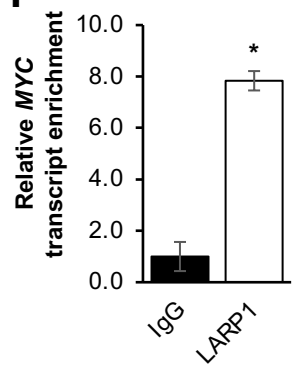

**G**

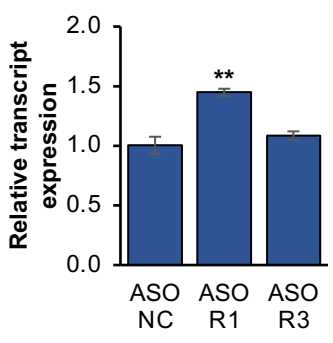

**H**

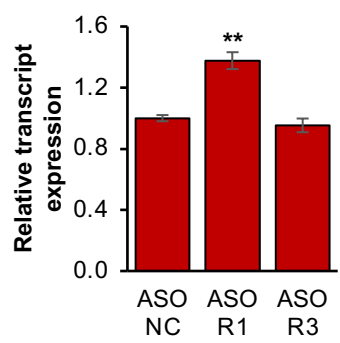

# Supplementary Fig. S4

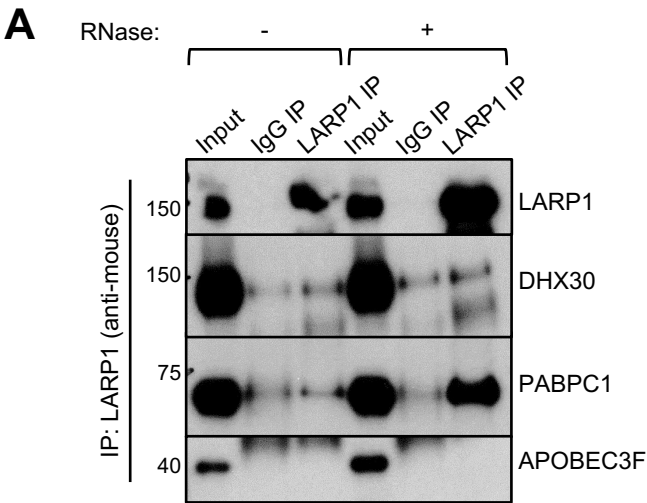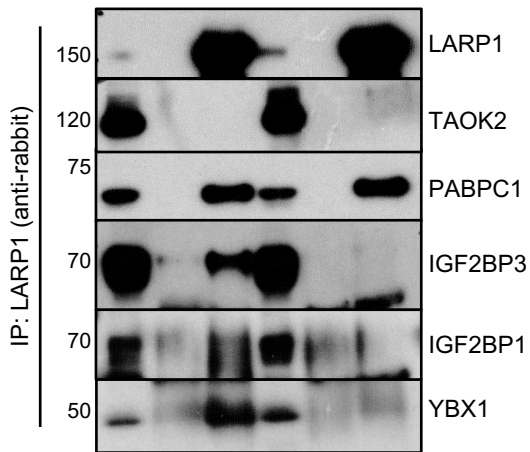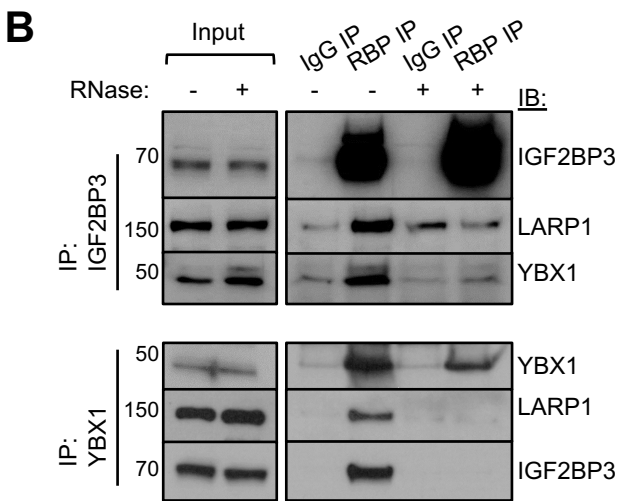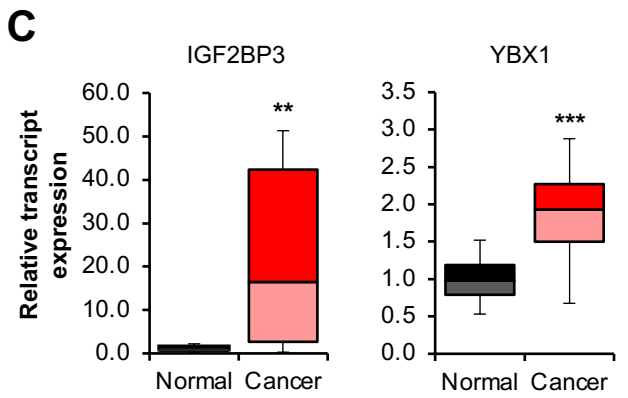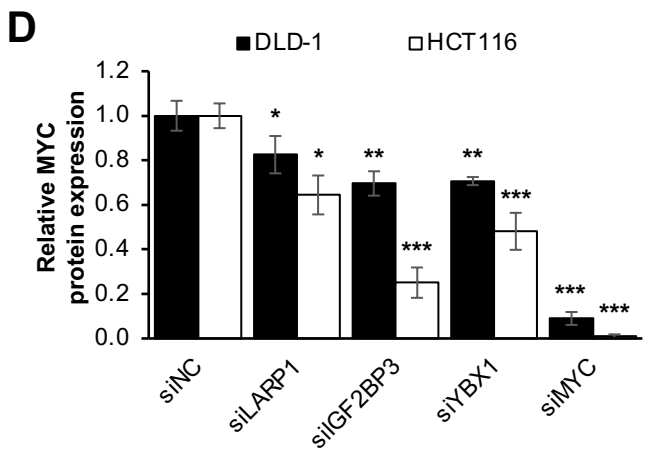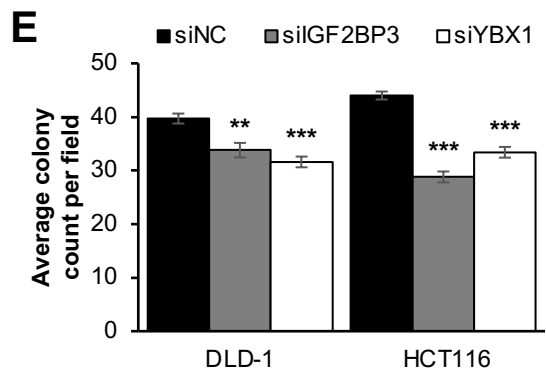



# Supplementary Fig. S5

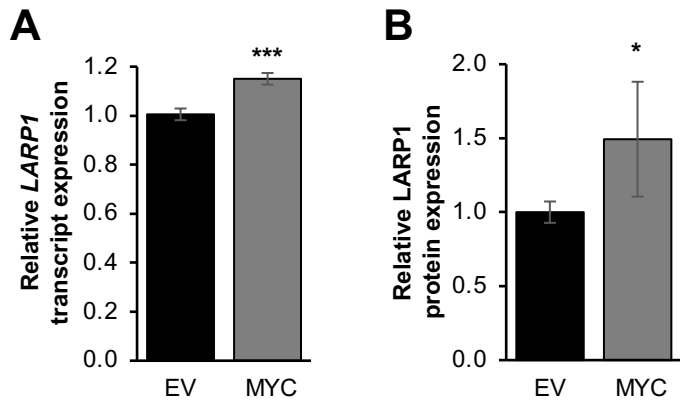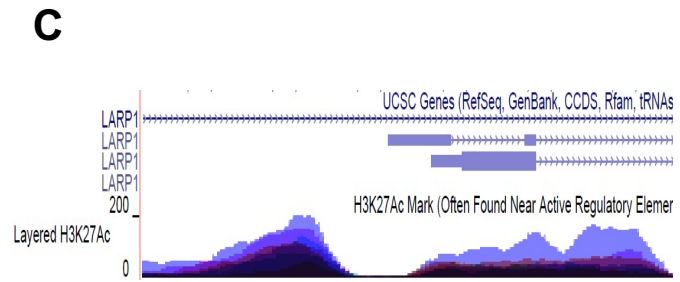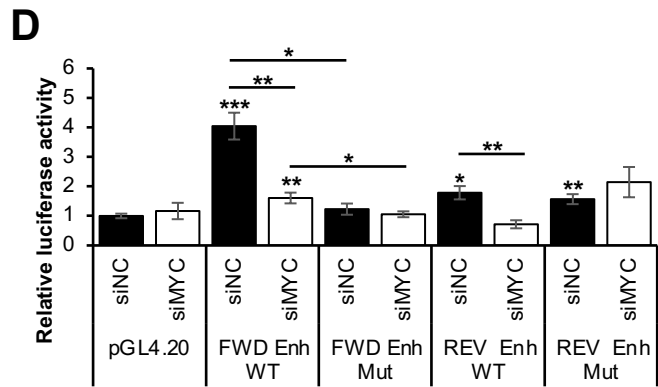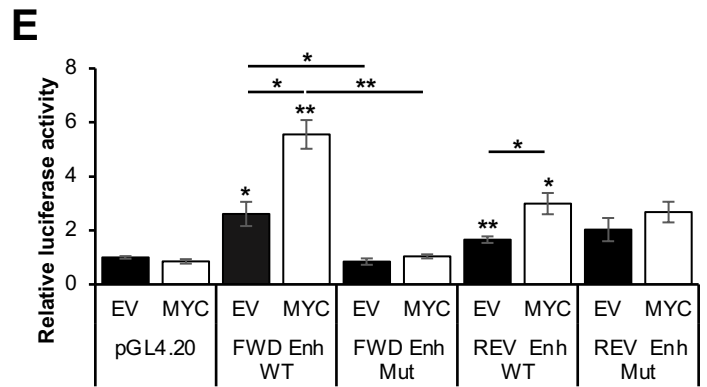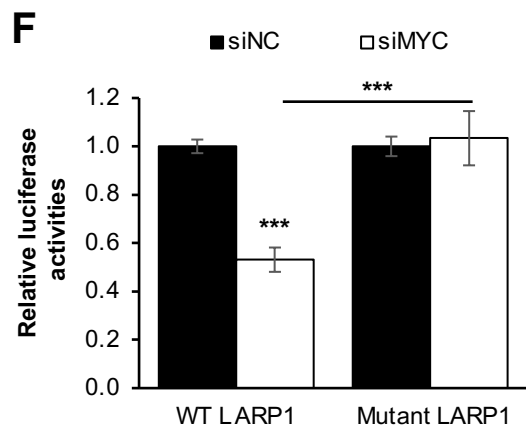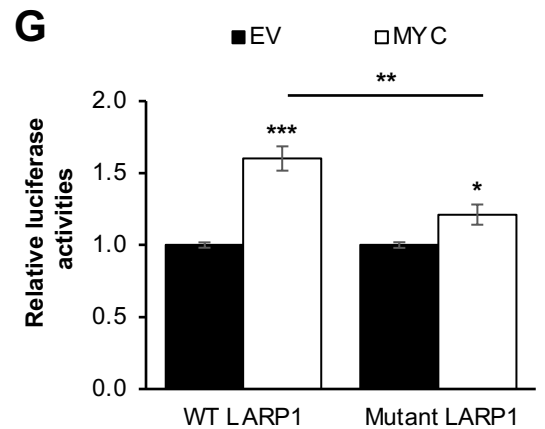

Supplement: 18_2021_4093_MOESM3_ESM.pdf [file 18_2021_4093_MOESM3_ESM.pdf]
